# Supplementary material for: Symbiotic N fixation is sufficient to support net aboveground biomass accumulation in a humid tropical forest
Source: PubMed Central journal article supplement (PMC6527854; doi:10.1038/s41598-019-43962-5), 2019-05-20
Supplement: 41598_2019_43962_MOESM1_ESM.pdf [file 41598_2019_43962_MOESM1_ESM.pdf]

## Supplementary Information

### **Symbiotic N fixation is sufficient to support net aboveground biomass accumulation in a humid tropical forest**

E.N.J Brookshire<sup>1</sup>, Nina Wurzburger<sup>2</sup>, Bryce Currey<sup>1</sup>, Duncan N.L. Menge<sup>3</sup>, Michael P. Oatham<sup>4</sup>, Carlton Roberts<sup>5</sup>

1 Dept of Land Resources and Environmental Sciences, Montana State University;  
[jbrookshire@montana.edu](mailto:jbrookshire@montana.edu) and [brycecurrey93@gmail.com](mailto:brycecurrey93@gmail.com)

2 Odum School of Ecology, University of Georgia;  
[ninawurz@uga.edu](mailto:ninawurz@uga.edu)

3 Dept of Ecology, Evolution, and Environmental Biology, Columbia University;  
[dm2972@columbia.edu](mailto:dm2972@columbia.edu)

4 Dept of Life Sciences, University of the West Indies, St. Augustine;  
[Mike.oatham@sta.uwi.edu](mailto:Mike.oatham@sta.uwi.edu)

5 Trinidad Ministry of Agriculture, Land and Fisheries, Forestry Division;  
[Carlton.roberts@yahoo.com](mailto:Carlton.roberts@yahoo.com)

Corresponding author: [jbrookshire@montana.edu](mailto:jbrookshire@montana.edu)

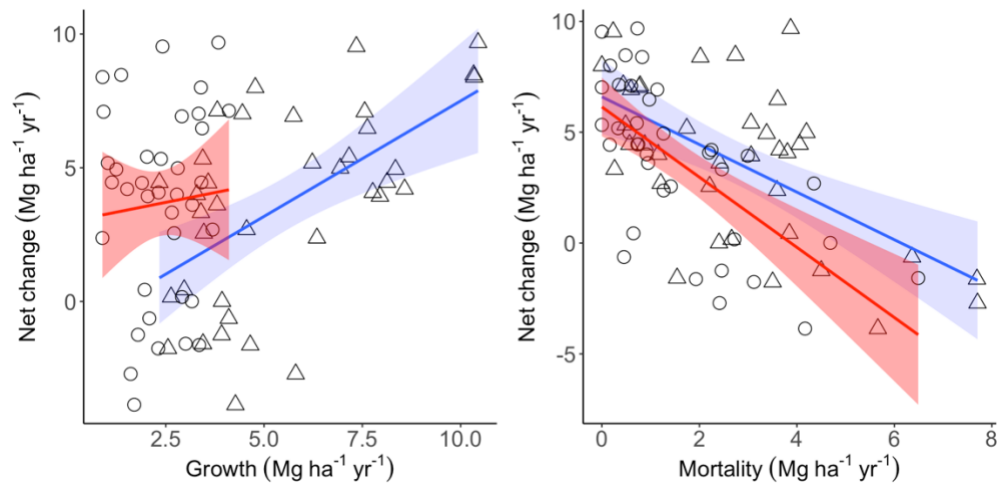

**Fig. S1.** Linear regressions showing effect of annual AGB growth and mortality on net incremental AGB change across five 1-ha VMFR forest plots. Each point represents one plot-census interval for N-fixers (circles and red lines and confidence 95% intervals) and non-fixers (triangles and blue lines and confidence intervals). Net biomass change across plots and over time was positively associated with annual growth of non-fixers ( $R^2= 0.30$ ,  $P<0.001$ ) and negatively associated with mortality of N-fixers ( $R^2= 0.42$ ,  $P<0.0001$ ) and non-fixers ( $R^2= 0.33$ ,  $P<0.0001$ ).

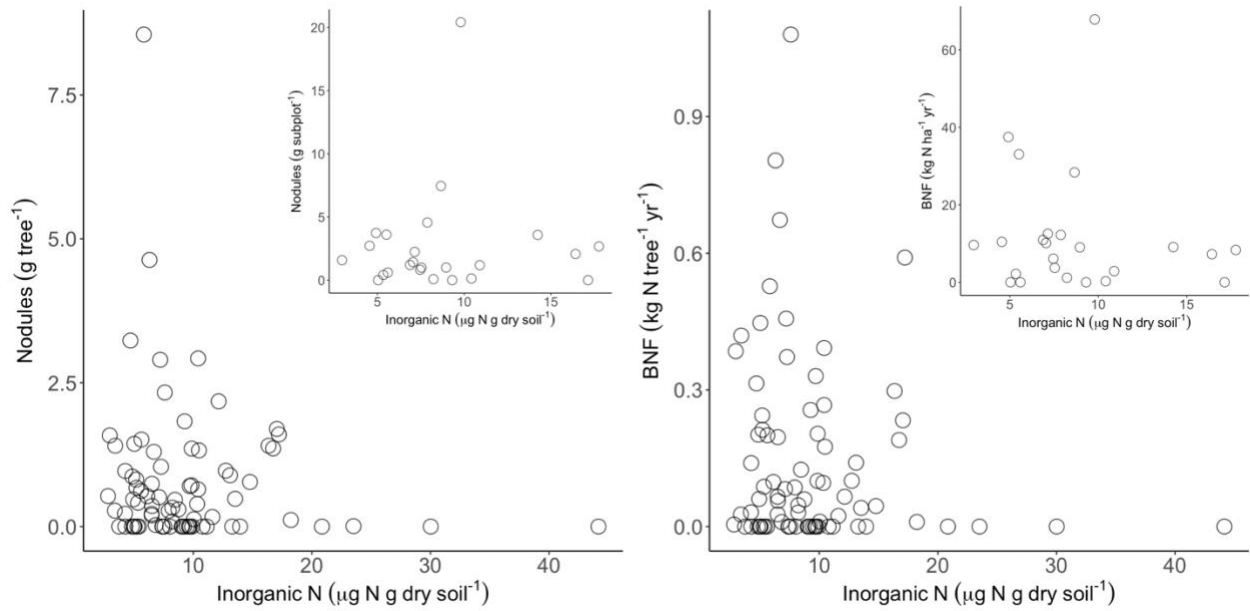

**Fig. S2.** Legume nodule mass and BNF versus soil inorganic N across individual stems in the 25 subplots within the VMFR. Insets show the relationship between nodule mass and BNF versus mean soil N at the subplot (20 x 20 m) scale. In all statistical analyses using linear mixed effects models and linear regression, we detected no significant ( $P > 0.2$ ) effect of soil N on nodule mass or BNF.

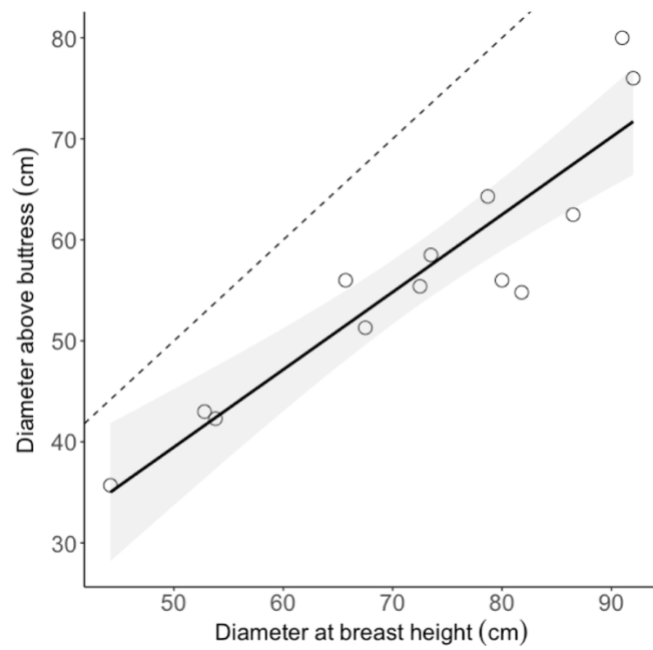

**Fig. S3.** Scaling relationship between tree diameter measured above the stem buttress vs. diameter measured at breast height (DBH). We used this empirical model  $D_c = 0.767 * DBH + 1.115$  (linear regression;  $R^2 = 0.85$ ,  $P < 0.001$ ) to correct diameters of trees that buttress at DBH for allometric calculations of biomass. The dashed line is the 1:1 line.

**Table S1.** Census intervals (number of censuses in parentheses), year of selective harvest (OG= Old-growth, never cut), long-term mean percent of stems that are *Pentaclethra macroloba* (PEMA) and long-term mean N fixer and non-fixer tree AGB among five 1-ha plots in VMFR.

| Plot | Interval       | Harvest | PEMA (%) | N-fixer AGB (Mg ha <sup>-1</sup> ) | Non-fixer AGB (Mg ha <sup>-1</sup> ) |
|------|----------------|---------|----------|------------------------------------|--------------------------------------|
| 5    | 1983-2013 (10) | 1981    | 21       | 56.7                               | 236.4                                |
| 18   | 1983-2013 (8)  | 2000    | 45       | 96.6                               | 137.6                                |
| 26   | 1983-2009 (8)  | 2005    | 26       | 68.2                               | 111.4                                |
| 30   | 1983-2002 (8)  | 2012    | 34       | 85.9                               | 128.0                                |
| 41   | 1984-2009 (8)  | OG      | 14       | 46.6                               | 265.6                                |

**Table S2.** Summary table of Linear Mixed Effects model comparisons for AGB and stem demographics in our five 1-ha plots in the VMFR. Shown are  $\Delta$ AICc values for each model tested with the best fit model shown in bold. Models for with  $\Delta$ AICc < 2 are shown in italics, indicating that they yielded equivalent fits as the lowest AICc model.

| Response variable | Model                                         | $\Delta$ AICc |
|-------------------|-----------------------------------------------|---------------|
| AGB               | Y ~ Type * Year, random =~1  Plot             | 140.80        |
|                   | <b>Y ~ Type * Year, random =~1  Plot/Type</b> | <b>0</b>      |
|                   | Y ~ Type * Year, random =~1  Time             | 151.66        |
|                   | Y ~ Type * Year, random =~1  Time/Type        | 154.05        |
| Stem RGR          | Y ~ Type + Year, random =~1  Plot             | 2.37          |
|                   | <b>Y ~ Type + Year, random =~1  Plot/Type</b> | <b>0</b>      |
|                   | Y ~ Type + Year, random =~1  Time             | 12.59         |
|                   | Y ~ Type + Year, random =~1  Time/Type        | 10.31         |
| Stem Mortality    | Y ~ Type + Year, random =~1  Plot             | 4.59          |
|                   | Y ~ Type + Year, random =~1  Plot/Type        | 6.96          |
|                   | <b>Y ~ Type + Year, random =~1  Time</b>      | <b>0</b>      |
|                   | Y ~ Type + Year, random =~1  Time/Type        | 2.37          |
| AGB Growth        | Y ~ Type + Year, random =~1  Plot             | 62.81         |
|                   | <b>Y ~ Type + Year, random =~1  Plot/Type</b> | <b>0</b>      |
|                   | Y ~ Type + Year, random =~1  Time             | 70.03         |
|                   | Y ~ Type + Year, random =~1  Time/Type        | 55.56         |
| AGB Mortality     | <i>Y ~ Type + Year, random =~1  Plot</i>      | <i>1.22</i>   |
|                   | Y ~ Type + Year, random =~1  Plot/Type        | 3.36          |
|                   | <b>Y ~ Type + Year, random =~1  Time</b>      | <b>0</b>      |
|                   | Y ~ Type + Year, random =~1  Time/Type        | 2.16          |
| AGB Recruitment   | Y ~ Type + Year, random =~1  Plot             | 2.21          |
|                   | <b>Y ~ Type + Year, random =~1  Plot/Type</b> | <b>0</b>      |
|                   | Y ~ Type + Year, random =~1  Time             | 2.72          |
|                   | Y ~ Type + Year, random =~1  Time/Type        | 2.37          |
| Net AGB Change    | Y ~ Type + Year, random =~1  Plot             | 3.73          |
|                   | <b>Y ~ Type + Year, random =~1  Plot/Type</b> | <b>0</b>      |
|                   | Y ~ Type + Year, random =~1  Time             | 4.61          |
|                   | Y ~ Type + Year, random =~1  Time/Type        | 6.62          |

**Table S3.** Summary table of Linear Mixed Effects model comparisons for BNF across our 25 subplots in our five 1-ha plots in the VMFR. Shown are  $\Delta\text{AICc}$  values for each model tested with the best fit model shown in bold. Models for with  $\Delta\text{AICc} < 2$  are shown in italics, indicating that they yielded equivalent fits as the lowest AICc model.

| <b>Response variable</b> | <b>Model</b>                                                                                | <b><math>\Delta</math> AICc</b> |
|--------------------------|---------------------------------------------------------------------------------------------|---------------------------------|
| BNF                      | <i><math>Y \sim \text{AGB}_{\text{tot}}, \text{random} = \sim 1   \text{Plot}</math></i>    | <i>1.05</i>                     |
|                          | <i><math>Y \sim \text{AGB}_{\text{non}}, \text{random} = \sim 1   \text{Plot}</math></i>    | <i>1.30</i>                     |
|                          | $Y \sim \text{AGB}_{\text{fix}}, \text{random} = \sim 1   \text{Plot}$                      | 6.15                            |
|                          | $Y \sim \text{Growth}_{\text{tot}}, \text{random} = \sim 1   \text{Plot}$                   | 5.97                            |
|                          | <b><math>Y \sim \text{Growth}_{\text{non}}, \text{random} = \sim 1   \text{Plot}</math></b> | <b>0</b>                        |
|                          | $Y \sim \text{Growth}_{\text{fix}}, \text{random} = \sim 1   \text{Plot}$                   | 5.48                            |
|                          | $Y \sim \text{Net}_{\text{tot}}, \text{random} = \sim 1   \text{Plot}$                      | 6.14                            |
|                          | $Y \sim \text{Net}_{\text{non}}, \text{random} = \sim 1   \text{Plot}$                      | 3.56                            |
|                          | $Y \sim \text{Net}_{\text{fix}}, \text{random} = \sim 1   \text{Plot}$                      | 5.62                            |
|                          | $Y \sim \text{DIN}, \text{random} = \sim 1   \text{Plot}$                                   | 5.43                            |

**Table S4. Parameter ranges and random sampling for Monte Carlo simulations of N demand.**

| <b>Parameter/Variable</b>                        | <b>Units</b>            | <b>Mean value</b> | <b>Random sampling</b> |
|--------------------------------------------------|-------------------------|-------------------|------------------------|
| <sup>a</sup> Fraction of AGB allocated to stems  | Unitless                | 0.98              | Uniform (0.97, 0.99)   |
| <sup>a</sup> Fraction of AGB allocated to leaves | Unitless                | 0.02              | Uniform (0.01, 0.03)   |
| <sup>b</sup> C:N of N fixer stems                | kg C kg N <sup>-1</sup> | 167               | Log-normal (85, 311)   |
| <sup>b</sup> C:N of non-fixer stems              | kg C kg N <sup>-1</sup> | 294               | Log-normal (92, 1361)  |
| <sup>c</sup> C:N of live N fixer leaves          | kg C kg N <sup>-1</sup> | 15.2              | Factorial (1.25)       |
| <sup>d</sup> C:N of live non-fixer leaves        | kg C kg N <sup>-1</sup> | 26.3              | Factorial (1.25)       |

<sup>a</sup>Chave et al. 2008; <sup>b</sup>Martin et al. 2014; <sup>c</sup>Tully et al. 2013; <sup>d</sup>Epihov et al. 2017
